# Supplementary material
Source: Springer Nature journal article supplement (https://www.springermedizin.de/resource/supplementary/13048_2010_62_MOESM6_ESM.pdf/9664854)

**Bu1a****CD3****S1P1****A**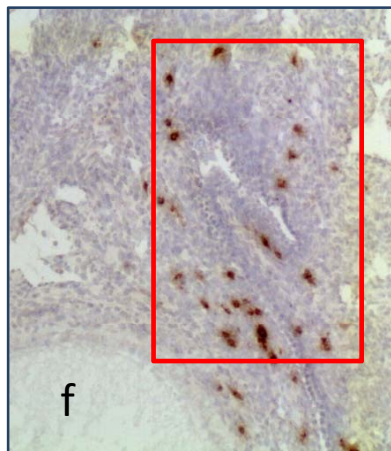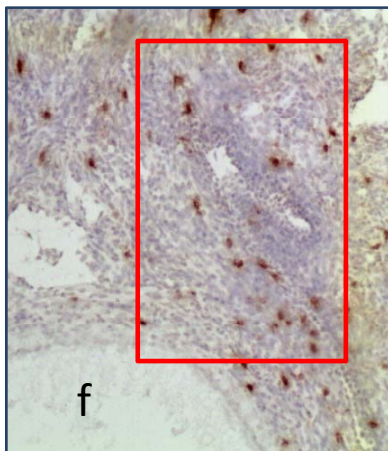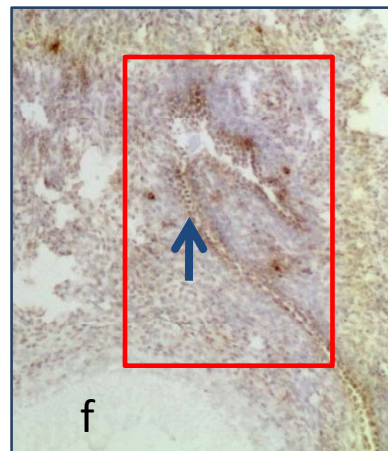**B**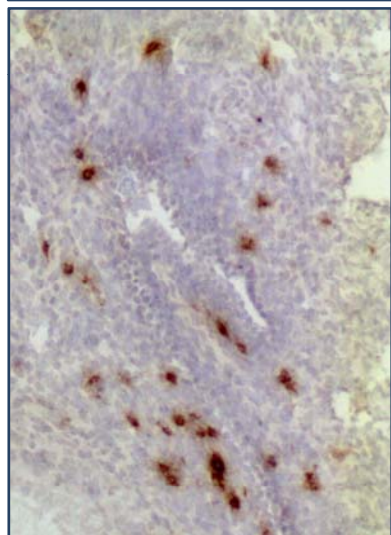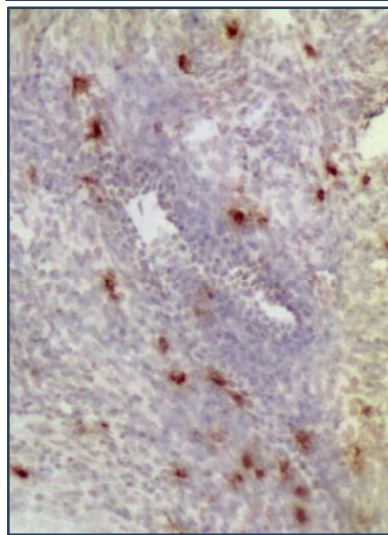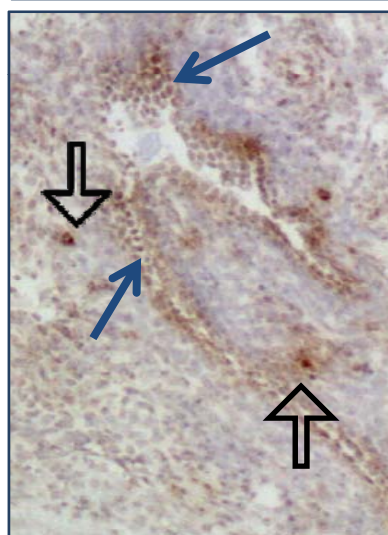**C**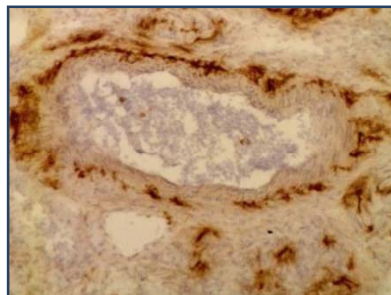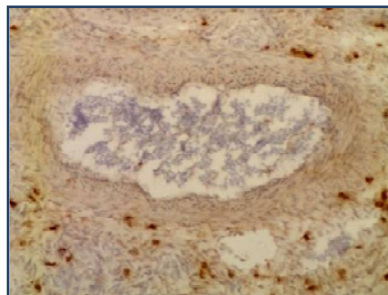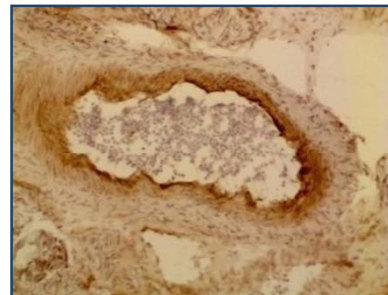

Supplement: MOESM6 [file 9664854]
